# Supplementary material for: Novel nonmetal catalyst of supported tetraphenylphosphonium bromide for acetylene hydrochlorination
Source: Royal Society of Chemistry journal article supplement (doi:10.1039/c8cy02103a), 2018-11-20
Supplement: c8cy02103a1.pdf [file c8cy02103a1.pdf]

## ***Supporting information***

# **Novel nonmetal catalyst of supported tetraphenylphosphonium bromide for acetylene hydrochlorination**

Xiaoyan Li<sup>a, b</sup>, Yao Nian<sup>a</sup>, Shanshan Shang<sup>c</sup>, Haiyang Zhang<sup>d</sup>, Jinli

Zhang<sup>a, d</sup>, You Han<sup>a\*</sup>, Wei Li<sup>a\*</sup>

<sup>a</sup> School of Chemical Engineering and Technology, Tianjin University, Collaborative  
Innovation Center of Chemical Science and Chemical Engineering (Tianjin), Tianjin  
300350, P. R. China.

<sup>b</sup> Renai College,  
Tianjin University,  
Tianjin 301636,  
China

<sup>b</sup> Department of Chemical Engineering, Renai College of Tianjin University, Tianjin  
301636, P. R. China.

<sup>c</sup> School of Energy and Environment, City University of Hong Kong, Tat Chee  
Avenue, Kowloon, Hong Kong, P. R. China.

<sup>d</sup> School of Chemistry and Chemical Engineering, Shihezi University, Shihezi,

Xinjiang, 832000, P. R. China.

**Table S1** The charge variations in atoms of HCl, C<sub>2</sub>H<sub>2</sub> and C<sub>2</sub>H<sub>3</sub>Cl adsorbed on TPPB.

|                                  | Atoms | Before         | After          | $\Delta(e)$ |
|----------------------------------|-------|----------------|----------------|-------------|
|                                  |       | adsorption (e) | Adsorption (e) |             |
| HCl                              | Cl    | -0.123         | -0.272         | -0.149      |
|                                  | H1    | 0.123          | 0.048          | -0.074      |
| C <sub>2</sub> H <sub>2</sub>    | C1    | -0.093         | -0.085         | 0.008       |
|                                  | C2    | -0.093         | -0.127         | -0.035      |
|                                  | H2    | 0.093          | 0.058          | -0.035      |
|                                  | H3    | 0.093          | 0.078          | -0.015      |
| C <sub>2</sub> H <sub>3</sub> Cl | H1    | 0.050          | 0.033          | -0.016      |
|                                  | Cl    | -0.067         | -0.082         | -0.015      |
|                                  | C1    | -0.081         | -0.071         | 0.010       |
|                                  | C2    | -0.008         | -0.023         | -0.015      |
|                                  | H2    | 0.052          | 0.052          | 0.000       |
|                                  | H3    | 0.054          | 0.045          | -0.008      |

**Table S2** The dihedral angle variations between atoms of HCl and C<sub>2</sub>H<sub>2</sub> adsorbed on TPPB.

|                                    | Dihedral Angle between atoms (°) |              |                |               |
|------------------------------------|----------------------------------|--------------|----------------|---------------|
|                                    | C2-C3-P7-C8                      | C9-C8-P7-C19 | C18-C19-P7-C24 | C23-C24-P7-C3 |
| Free TPPB                          | -69.546                          | -48.563      | -176.300       | -153.375      |
| TPPB-C <sub>2</sub> H <sub>2</sub> | -69.346                          | -49.383      | -167.562       | -160.655      |
| $\Delta$ change                    | 0.201                            | -0.819       | 8.737          | -7.279        |
| TPPB-HCl                           | -69.950                          | -47.696      | -170.516       | -157.465      |
| $\Delta$ change                    | -0.404                           | 0.868        | 5.783          | -4.090        |

The atomic numbers of HCl, C<sub>2</sub>H<sub>2</sub> and TPPB can be seen in Figure S1.

**Table S3** The charge variations of atoms and molecules for the reactants and the product during the reaction.

| Molecule                      | Atom              | Free   | Co-ads | $\Delta e$ (atom)<br>(Co-ads - Free) | $\Delta e$ (molecule)<br>(Co-ads - Free) | IM     | $\Delta e$ (atom)<br>(IM - Co-ads) | $\Delta e$ (molecule)<br>(IM - Co-ads) | TS     | $\Delta e$ (atom)<br>(TS - IM) | $\Delta e$ (molecule)<br>(TS - IM) | Pr-ads | $\Delta e$ (atom)<br>(Pr-ads - TS) | $\Delta e$ (molecule)<br>(Pr-ads - TS) |
|-------------------------------|-------------------|--------|--------|--------------------------------------|------------------------------------------|--------|------------------------------------|----------------------------------------|--------|--------------------------------|------------------------------------|--------|------------------------------------|----------------------------------------|
| C <sub>2</sub> H <sub>2</sub> | H2                | 0.093  | 0.062  | -0.031                               | -0.060                                   | 0.084  | 0.023                              | 0.020                                  | 0.094  | 0.010                          | 0.197                              | 0.052  | -0.042                             | 0.273                                  |
|                               | C1                | -0.093 | -0.086 | 0.007                                |                                          | -0.109 | -0.023                             |                                        | -0.071 | 0.038                          |                                    | -0.071 | 0.000                              |                                        |
|                               | C2                | -0.093 | -0.118 | -0.025                               |                                          | -0.070 | 0.048                              |                                        | 0.059  | 0.129                          |                                    | -0.023 | -0.082                             |                                        |
|                               | H3                | 0.093  | 0.082  | -0.011                               |                                          | 0.054  | -0.027                             |                                        | 0.075  | 0.020                          |                                    | 0.045  | -0.029                             |                                        |
| HCl                           | Cl                | -0.123 | -0.255 | -0.132                               | -0.204                                   | -0.603 | -0.348                             | -0.325                                 | -0.521 | 0.082                          | 0.055                              | -0.082 | 0.439                              |                                        |
|                               | H1                | 0.123  | 0.051  | -0.072                               |                                          | 0.074  | 0.022                              |                                        | 0.047  | -0.027                         |                                    | 0.033  | -0.013                             |                                        |
| TPPB                          | Br <sup>-</sup>   | -0.668 | -0.478 | 0.190                                | 0.264                                    | -0.146 | 0.331                              | 0.305                                  | -0.398 | -0.251                         | -0.252                             | -0.634 | -0.236                             | -0.273                                 |
|                               | PPh <sup>4+</sup> | 0.668  | 0.742  | 0.074                                |                                          | 0.716  | -0.026                             |                                        | 0.715  | -0.001                         |                                    | 0.678  | -0.037                             |                                        |

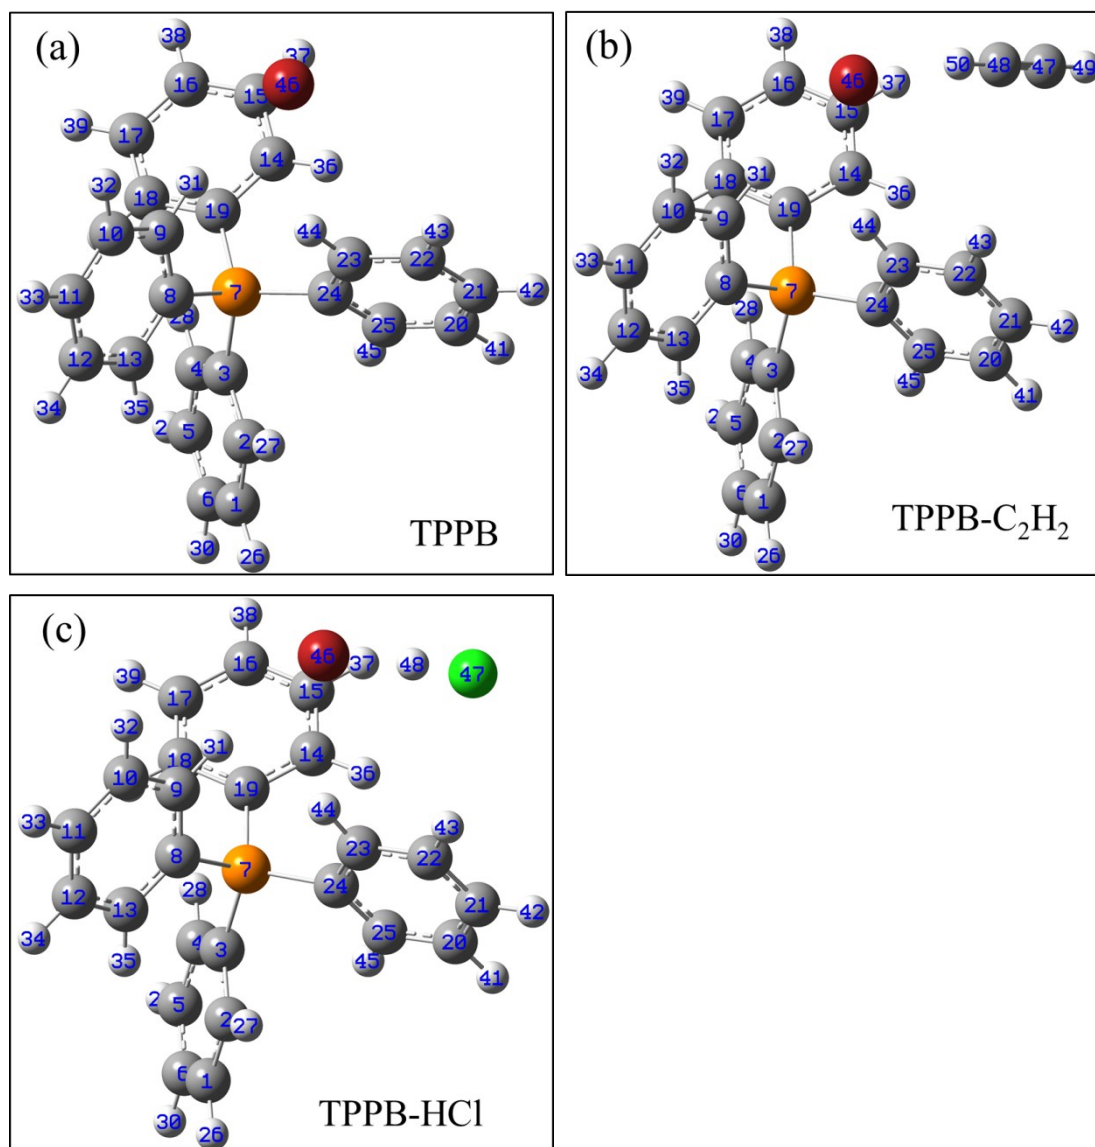

**Fig. S1** The stable structures of TPPB (a), TPPB-C<sub>2</sub>H<sub>2</sub> (b) and TPPB-HCl (c). Carbon, hydrogen, bromine, phosphorus and chlorine atoms are depicted in gray, white, red, orange and green, respectively.

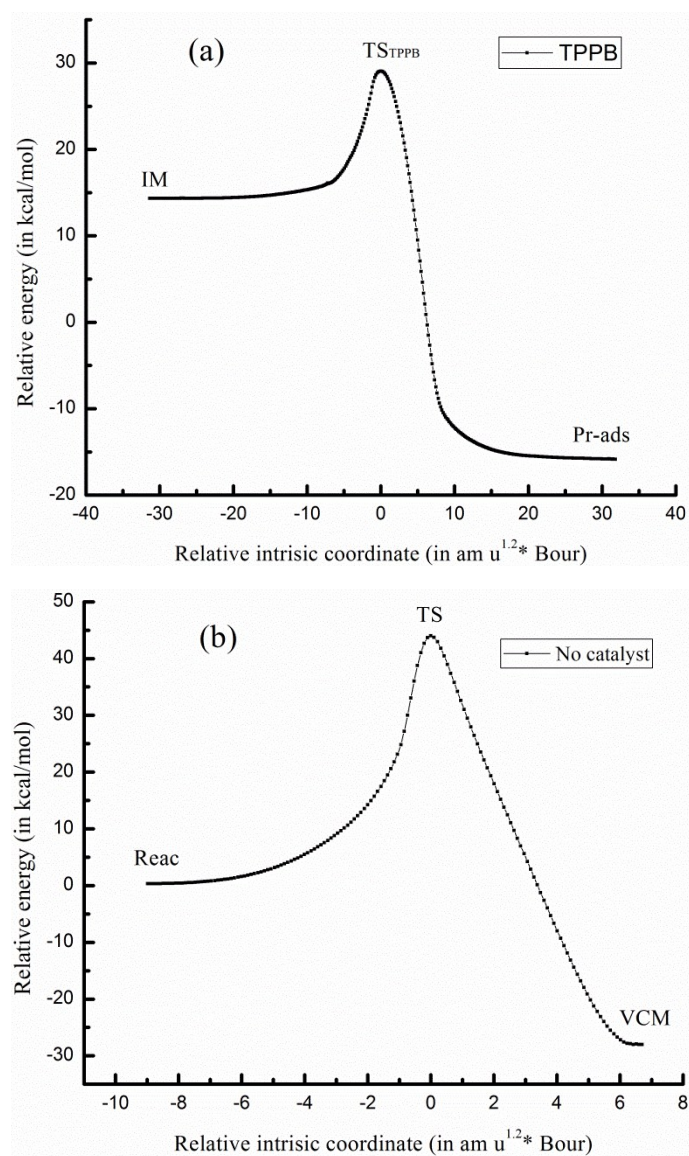

**Fig. S2** IRC calculation for acetylene hydrochlorination with (a) and without (b) TPPB catalyst.

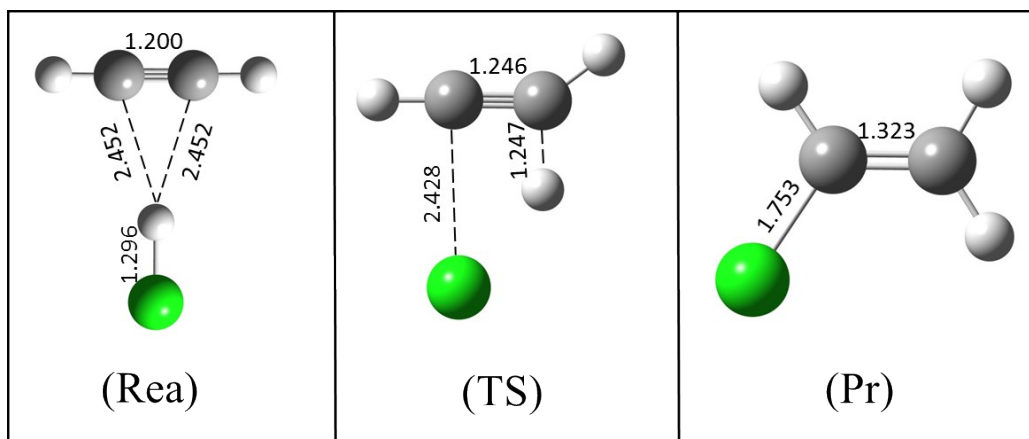

**Fig. S3** The geometries of the substances involved in the reaction pathway without catalyst. Carbon, hydrogen and chlorine atoms are depicted in gray, white and green, respectively.

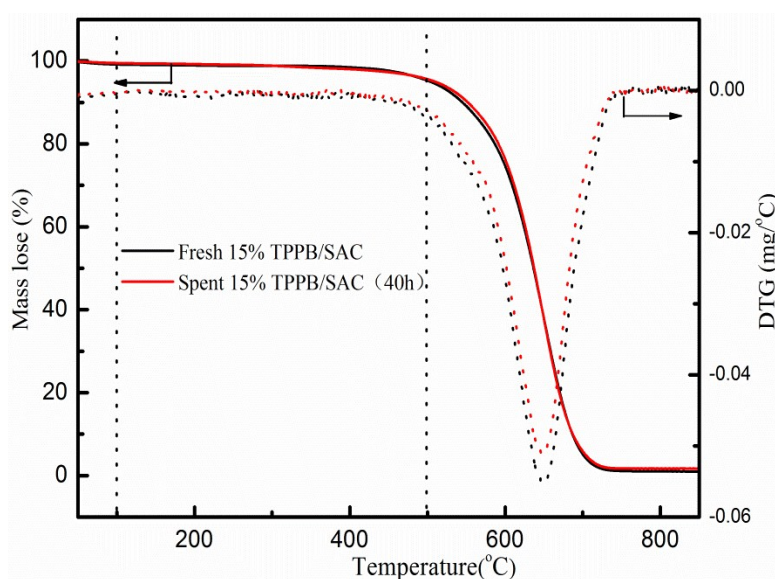

**Fig. S4** TGA curves of the fresh and spent 15% TPPB/SAC catalysts (after 40 h reaction, under the reaction conditions of 220 °C, GHSV (C<sub>2</sub>H<sub>2</sub>) = 30 h<sup>-1</sup> and V<sub>HCl</sub>/V<sub>C<sub>2</sub>H<sub>2</sub></sub> = 1.15) in air atmosphere.
